# Supplementary material for: Androgen signaling restricts glutaminolysis to drive sex-specific Th17 metabolism in allergic airway inflammation
Source: JCI journal article supplement (doi:10.1172/jci177242), 2024-10-15
Supplement: sd1 [file 1]

## **Supplemental Information for Androgen Signaling Restricts Glutaminolysis to Drive Sex-Specific Th17 Metabolism in Allergic Airway Inflammation**

Nowrin U Chowdhury<sup>1,2</sup>, Jacqueline-Yvonne Cephus<sup>3</sup>, Emely Henriquez Pilier<sup>1,2</sup>, Melissa M Wolf<sup>1,2</sup>, Matthew Z Madden<sup>1,2</sup>, Shelby N Kuehnle<sup>3</sup>, Kaitlin E McKernan<sup>1,2</sup>, Erin Q. Jennings<sup>2,3</sup>, Emily N Arner<sup>2,3</sup>, Darren R. Heintzman<sup>1,2</sup>, Channing Chi<sup>1</sup>, Ayaka Sugiura<sup>1,2</sup>, Matthew T Stier<sup>2,3</sup>, Kelsey Voss<sup>1,2</sup>, Xiang Ye<sup>1</sup>, Kennedi Scales<sup>3</sup>, Evan S Krystofiak<sup>4</sup>, Vivek D Gandhi<sup>3</sup>, Robert D. Guzy<sup>5</sup>, Katherine N Cahill<sup>3</sup>, Anne I Sperling<sup>6</sup>, R. Stokes Peebles, Jr.<sup>3</sup>, Jeffrey C Rathmell<sup>1,2</sup>, and Dawn C Newcomb<sup>1,2,3</sup>

<sup>1</sup>Department of Pathology, Microbiology, and Immunology, Vanderbilt University Medical Center, Nashville, TN, USA

<sup>2</sup>Vanderbilt Center for Immunobiology, Vanderbilt University Medical Center, Nashville, TN, USA

<sup>3</sup>Department of Medicine, Vanderbilt University Medical Center, Nashville, TN, USA

<sup>4</sup>Department of Cellular and Molecular Biology, Vanderbilt University, Nashville, TN, USA

<sup>5</sup>Department of Medicine, University of Wisconsin, Madison, WI, USA

<sup>6</sup>Department of Medicine, University of Virginia, Charlottesville, VA, USA

Corresponding Author:

Dawn C. Newcomb, PhD

T-2220 Medical Center North

1161 21<sup>st</sup> Avenue South

Nashville, TN 37232

Dawn's office number (615) 875-7782

dawn.newcomb@vumc.org

**A**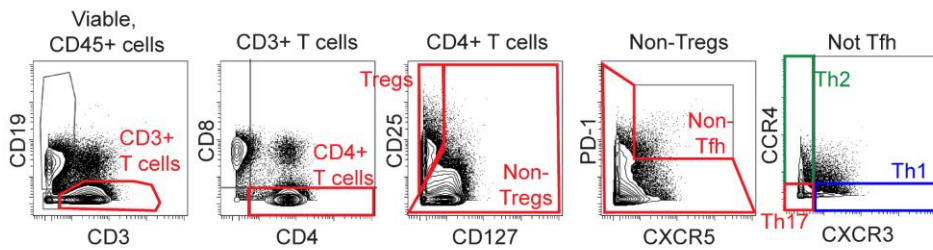

Populations defined:

|              |                                              |
|--------------|----------------------------------------------|
| CD4+ T cells | Viable, CD3+, CD4+, CD8- cells               |
| Th1 cells    | CD4+ T cells, CD127+, non-Tfh, CXCR3+, CCR4- |
| Th2 cells    | CD4+ T cells, CD127+, non-Tfh, CXCR3-, CCR4+ |
| Th17 cells   | CD4+ T cells, CD127+, non-Tfh, CXCR3-, CCR4- |
| Treg cells   | CD4+ T cells, CD127-, CD25+                  |

**B**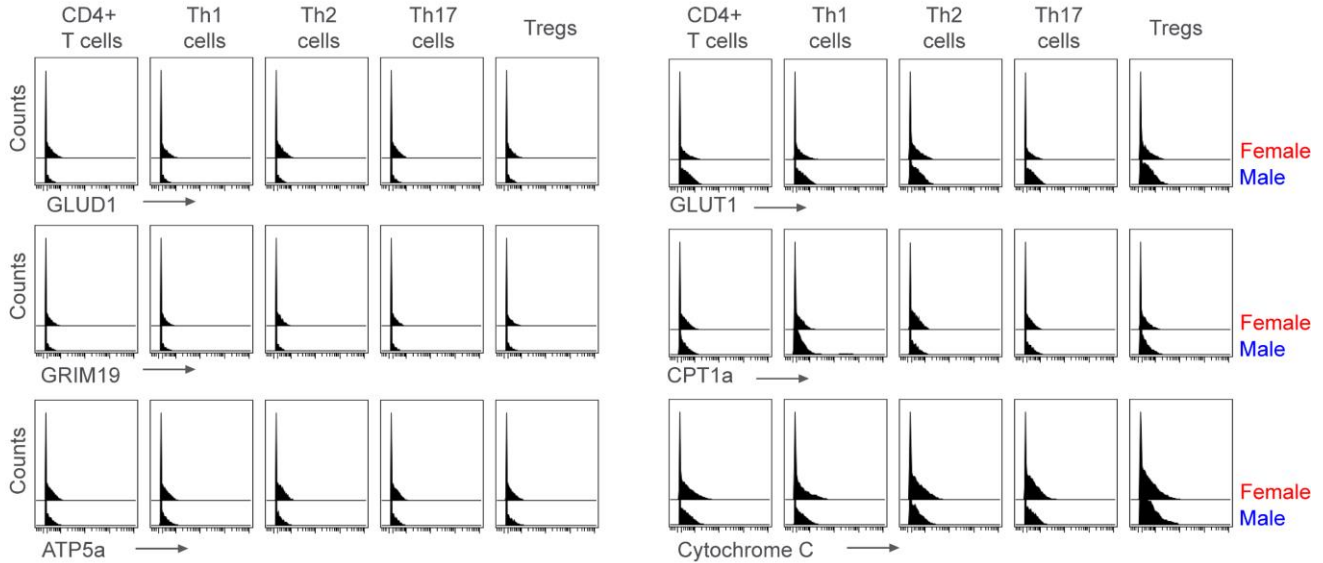**C**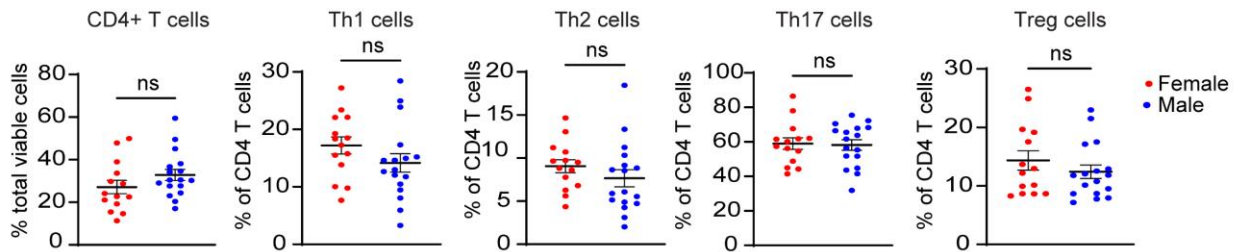

**Supplemental Figure 1. Sex differences in metabolic marker expression in lung draining lymph nodes. Related to Figure 1.** CYTOF was conducted on human lung draining lymph nodes from female (n=14) and male (n=17) deceased donors. **(A-B)** Gating strategy for CYTOF and CD4+ T cell populations defined. **(C)** Quantification of percentage of cell subsets in lung draining lymph nodes. n=14-17, mean  $\pm$  SEM. \*p<0.05, ns: not significant, two-tailed Mann-Whitney U test.

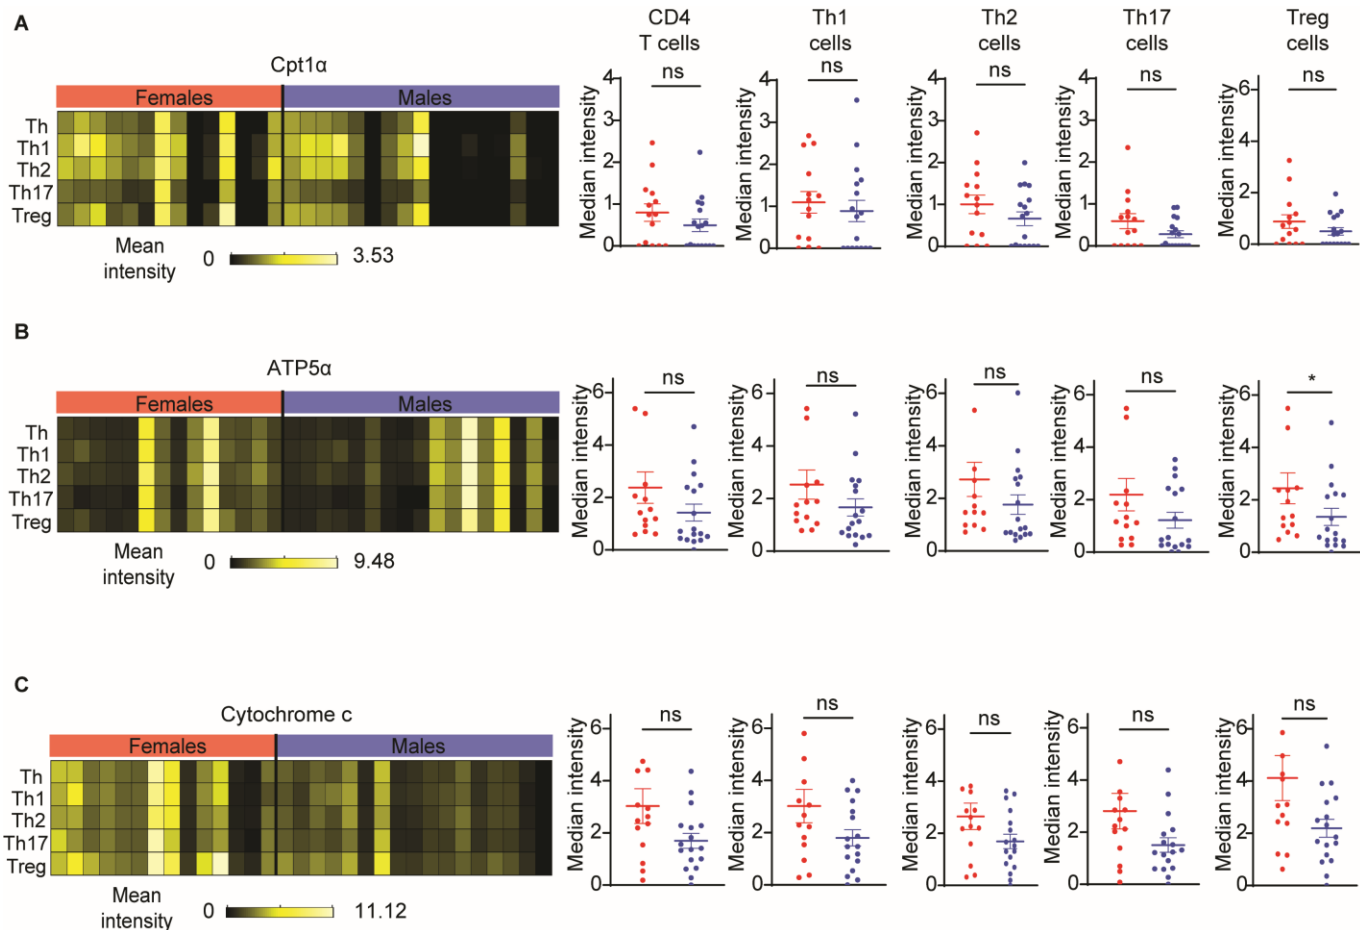

**Supplemental Figure 2. CYTOF of lung draining lymph nodes reveals sex difference in ATP5a expression in Tregs. Related to Figure 1.** CyTOF was conducted on human lung draining lymph nodes from de-identified female (n=14) and male (n=17) deceased donors. **(A-C)** Median expression of metabolic markers on CD4+ T cells, Th1, Th2, Th17, and Treg cells. Gating strategies and population definitions are shown in Figure S1. (mean  $\pm$  SEM). \* $p < 0.05$ , ns: not significant, two-tailed Mann-Whitney U test. See Supplemental Figure 1 and Supplemental Tables 1-2.

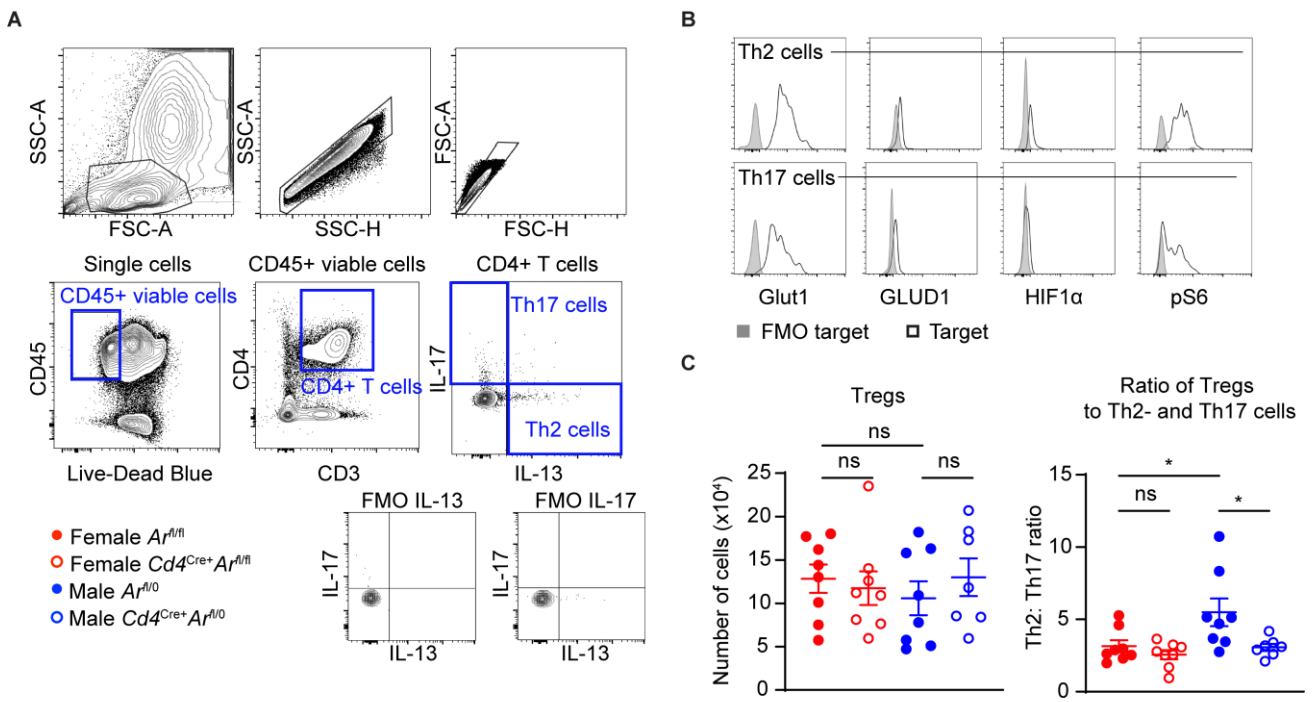

**Supplemental Figure 3. Gating strategy for identification of Th2, Th17, and Tregs in HDM- challenged mice. Related to Figure 2. (A-B)** Gating strategies for lung Th2 (IL-13+ CD4+ T cells) and Th17 cells (IL-17A+ CD4+ T cells) and expression of metabolites. **(C)** Quantification of Treg cell number and ratio of Tregs to Th2- and Th17 cells. Data was expressed as mean  $\pm$  SEM: n=7-9 mice per group combined from 2 independent experiments. \* $p < 0.05$ , ns: not significant, ANOVA with post-hoc Tukey testing.

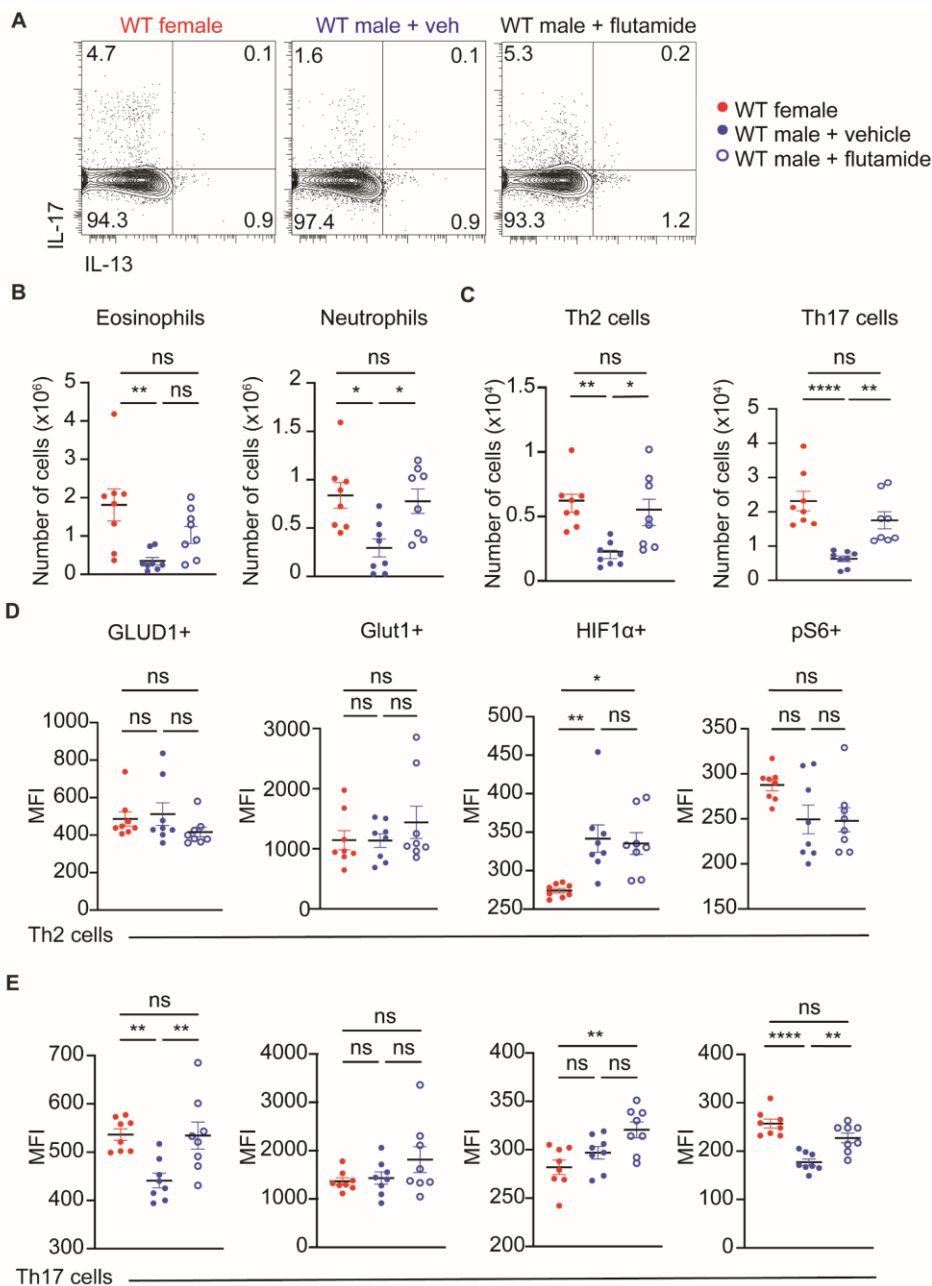

**Supplemental Figure 4. Flutamide, an AR antagonist, increased HDM-induced Th17-mediated airway inflammation. Related to Figure 2.** WT males were subcutaneously implanted with a vehicle or 50mg flutamide pellet for 3 weeks. HDM induced airway inflammation was induced on WT female, WT male + vehicle pellet, and WT male + flutamide pellet as described in Figure 2A. **(A)** Representative flow plots of IL-13+ Th2 cells and IL-17A+ Th17 cells. **(B)** Quantification of eosinophils and neutrophils in the BAL fluid from mice. **(C)** Quantification of lung Th2 and Th17 cells after HDM challenge. **(D-E)** Expression of GLUD1, Glut1, HIF1 $\alpha$ , and pS6 in lung Th2 cells (top) and Th17 cells (bottom) after HDM challenge. Data are expressed as mean  $\pm$  SEM: n=7-8 mice per group. \* $p < 0.05$ , \*\* $p < 0.01$ , \*\*\*\* $p < 0.0001$ , ns: not significant, ANOVA with post-hoc Tukey testing.

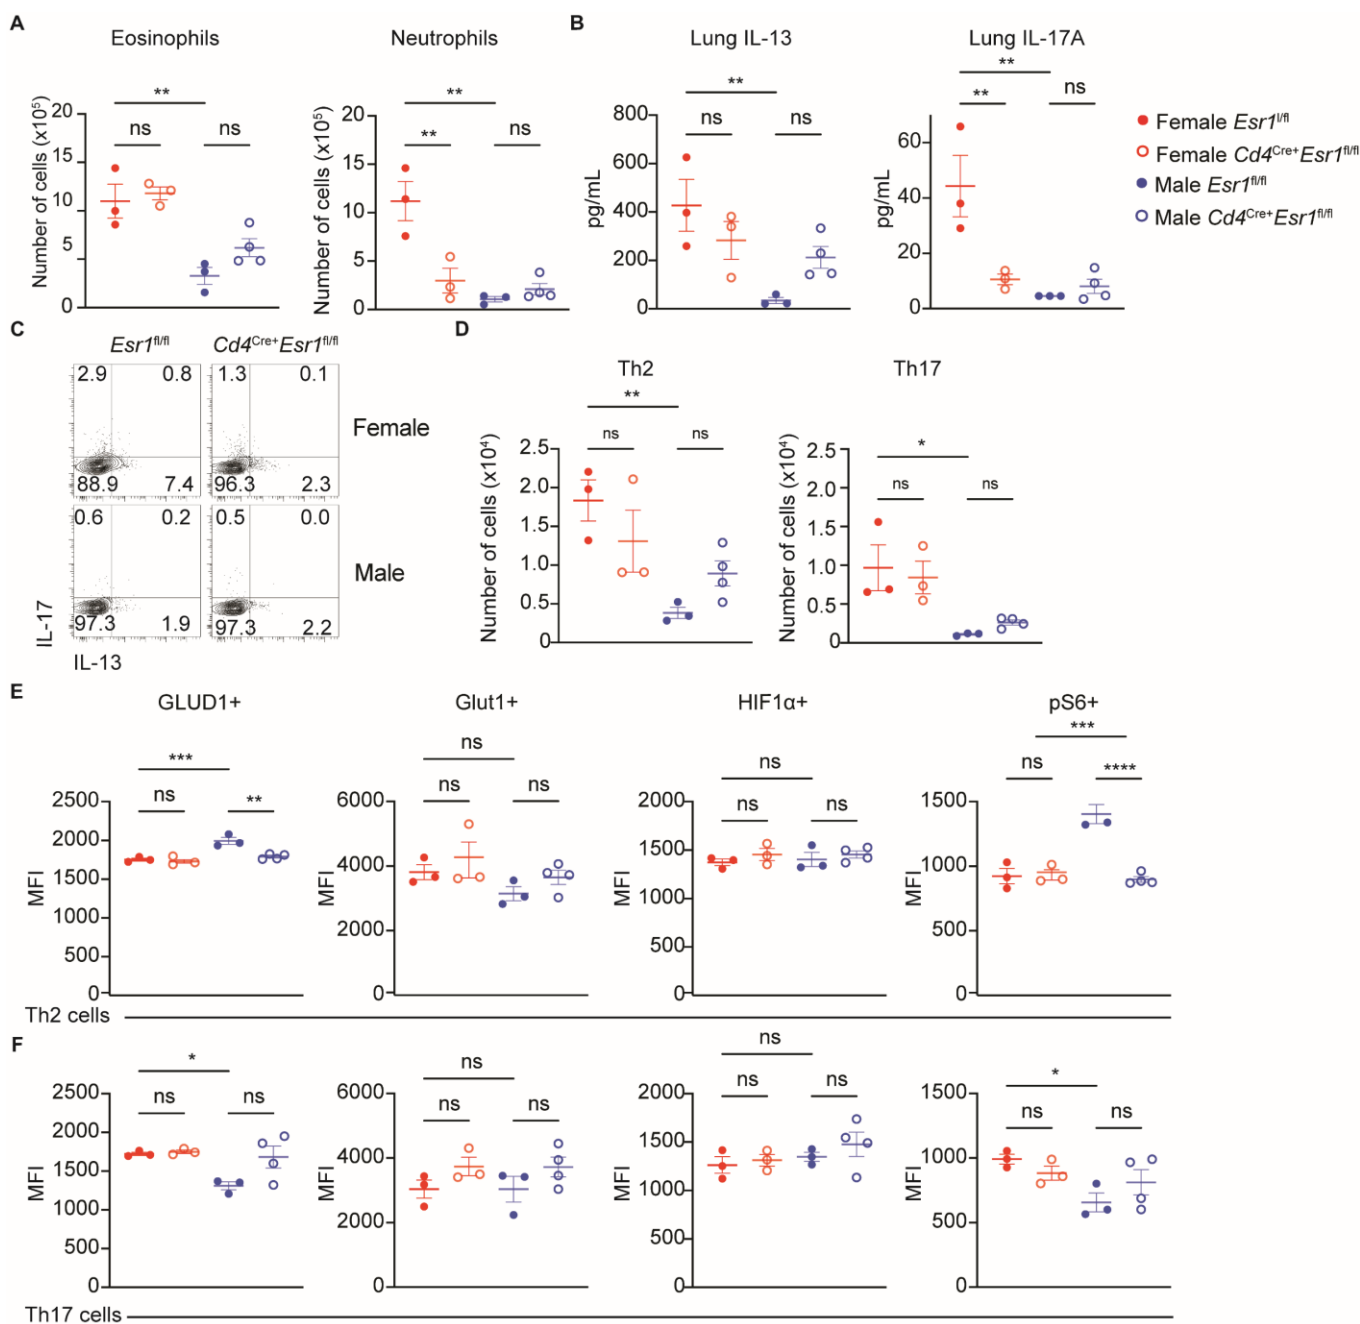

**Supplemental Figure 5. Estrogen receptor alpha (ER $\alpha$ ) signaling in CD4<sup>+</sup> T cells increases neutrophil infiltration and Th17 cells in the lung, but does not impact the expression of metabolic enzymes in Th17 cells. Related to Figure 2.** HDM induced airway inflammation was induced on female and male *Esr1<sup>fl/fl</sup>* and *Cd4<sup>Cre</sup>+Esr1<sup>fl/fl</sup>* mice as described in Figure 2A. **(A)** Quantification of eosinophils and neutrophils in the BAL fluid from mice. **(B)** IL-13 and IL-17A protein expression in whole lung homogenate. **(C)** Representative flow diagrams of IL-13<sup>+</sup> Th2 cells and IL-17A<sup>+</sup> Th17 cells. **(D)** Quantification of Th2 and Th17 cells in the lung. **(E-F)** Expression of GLUD1, Glut1, HIF1 $\alpha$ , and pS6 in lung Th2 cells (top) and Th17 cells (bottom) after HDM challenge. Data are expressed as mean  $\pm$  SEM; n=3-4 mice per group. \*p<0.05, \*\*p<0.01, \*\*\*p<0.001, \*\*\*\*p<0.0001, ns: not significant, ANOVA with post-hoc Tukey testing.

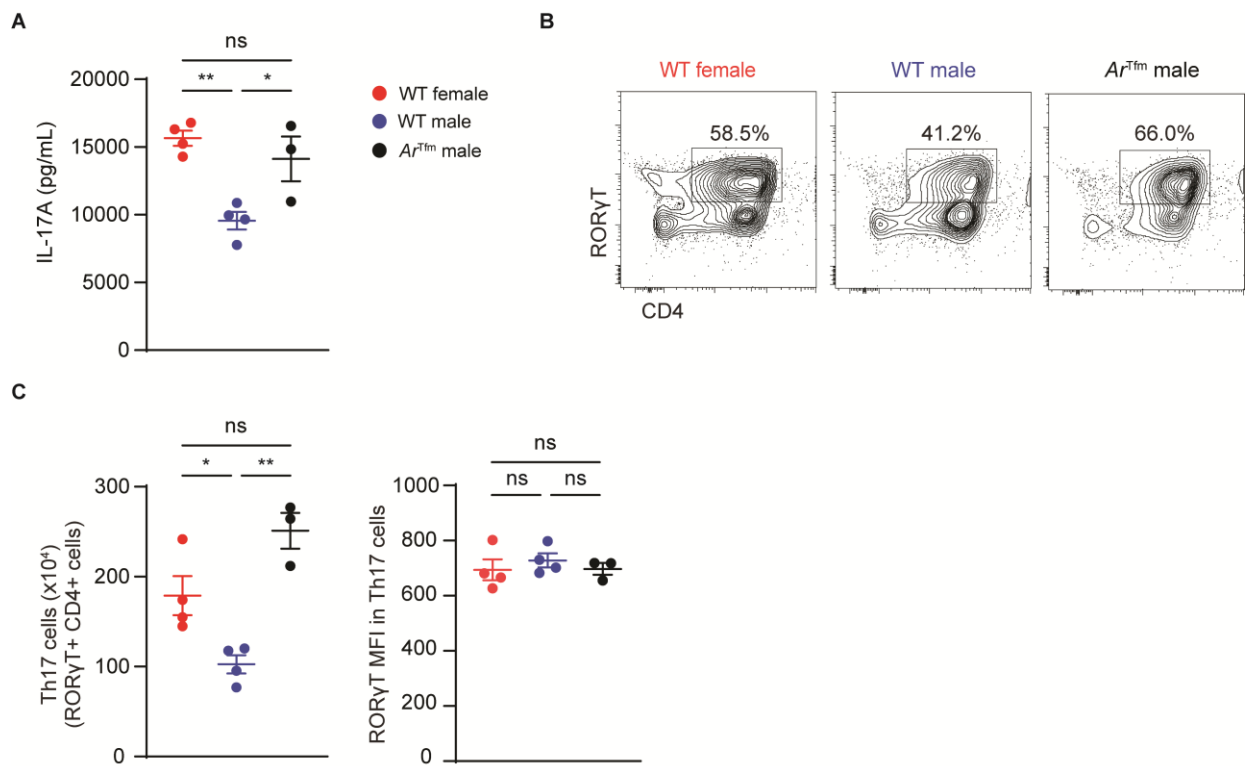

**Supplemental Figure 6. AR signaling decrease IL-17A production and Th17 cell differentiation. Related to Figure 3.** Naïve CD4+ T cells were isolated from spleens of WT female, WT male, and  $Ar^{Tfm}$  male mice and differentiated into Th17 cells. Cells and culture supernatants were collected on day 4. **(A)** IL-17A production in culture supernatants. **(B)** Representative flow plots of RORγT+ CD4+ T cells (Th17 cells). **(C)** Total numbers of RORγT+ CD4+ T cells (Th17 cells) were quantified by flow cytometry as well as the MFI for RORγT in Th17 cells. Data are expressed as mean  $\pm$  SEM: n=3-4 mice per group. \* $p < 0.05$ , \*\* $p < 0.01$ , ns: not significant, ANOVA with post-hoc Tukey testing.

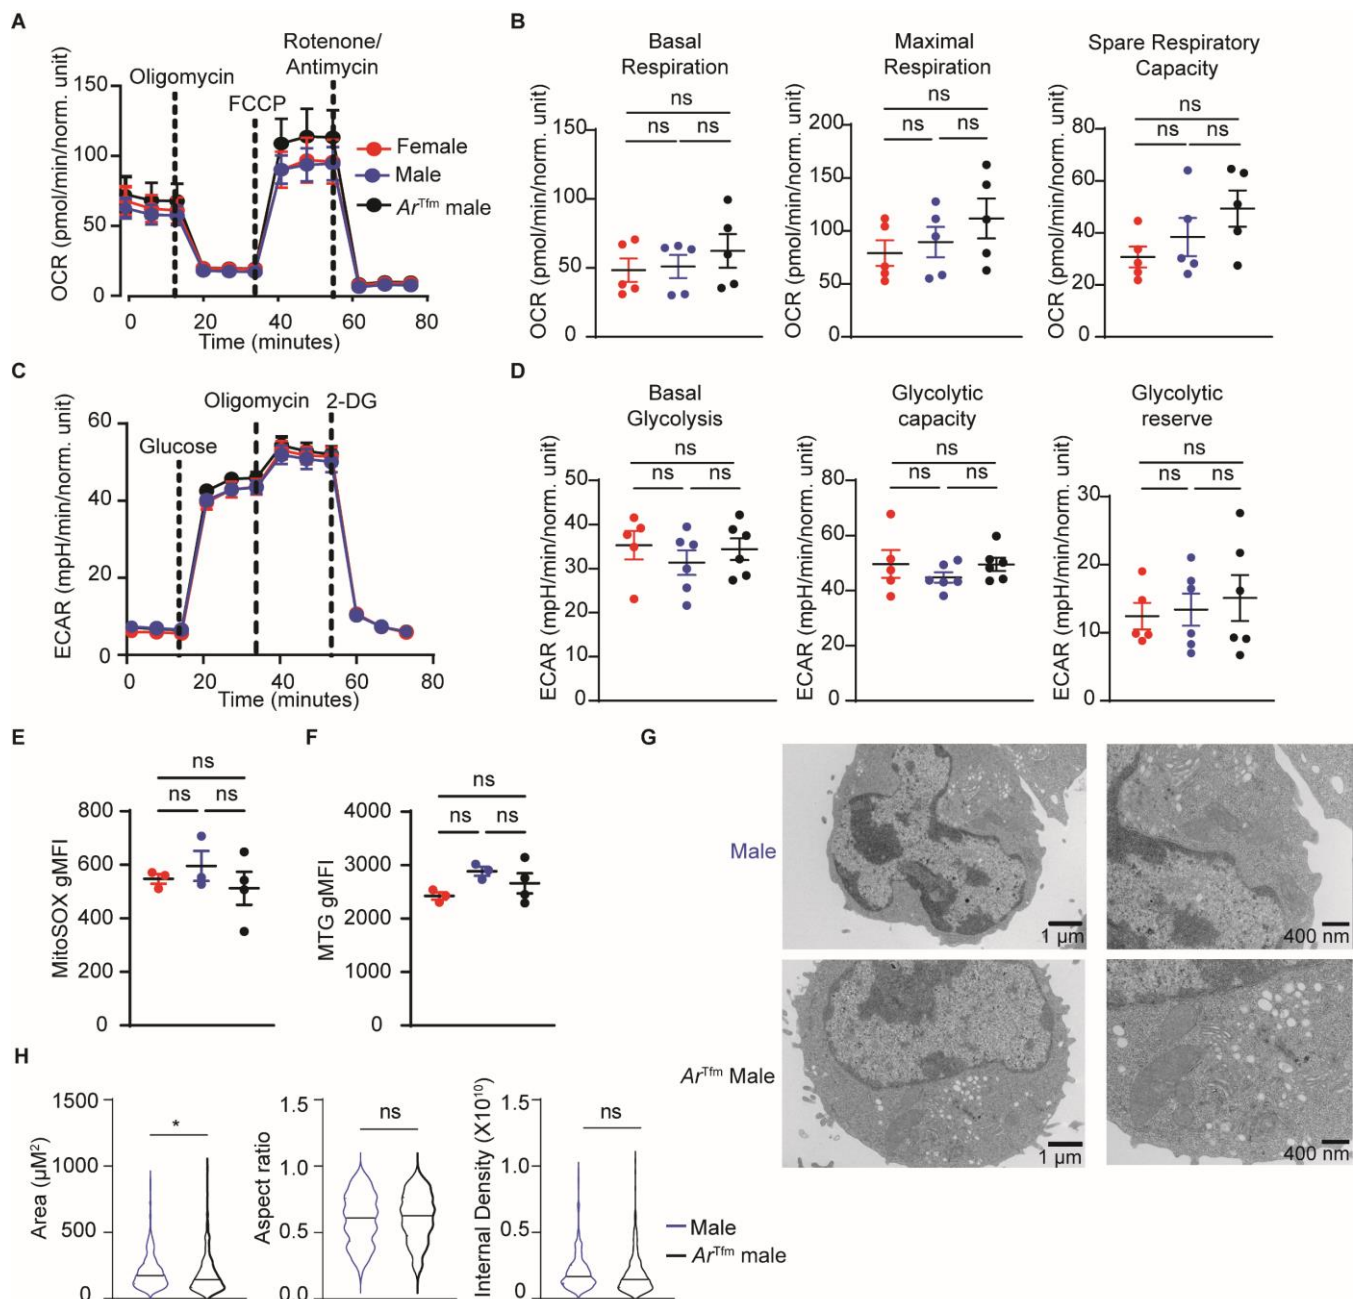

**Supplemental Figure 7. AR signaling does not impact Th2 metabolism and EM quantification of Th17 cells. Related to Figure 3. (A)** Seahorse MitoStress Test on differentiated Th2 cells from WT female, WT male, and *Ar<sup>Tfm</sup>* male mice measures mitochondrial respiration using oxygen consumption rate (OCR). **(B)** Quantified measures of basal respiration, maximal respiration, and spare respiratory capacity from panel A. **(C)** Seahorse GlycoStress test on differentiated Th2 cells from WT female, WT male, and *Ar<sup>Tfm</sup>* male mice to measure glycolysis using extracellular acidification rate (ECAR). **(D)** Quantified measures of basal glycolysis, glycolytic capacity, and glycolytic reserve from panel C. **(E-F)** Expression of MitoSOX Red and Mitotracker green (MTG) in Th2 cells from WT female, WT male and *Ar<sup>Tfm</sup>* male mice (n=3-4 mice per group, representative of 2 independent experiments). **(B-F)** Graphs show mean  $\pm$  SEM, \*p<0.05 or as shown, ns not significant, ANOVA with post-hoc Tukey testing. **(G-H)** EM pictures and quantification of Th17 cells from males and *Ar<sup>Tfm</sup>* male mice. Images are representative of 3 biological replicates for each group. Quantification was done on 100-110 mitochondria per sample. \*p<0.05 or as shown, ns not significant, unpaired T test.



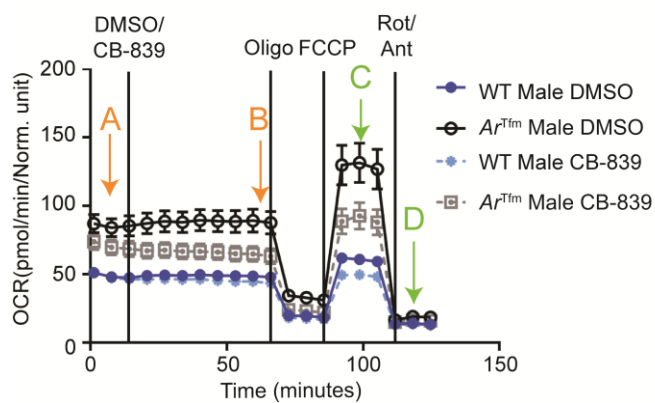

| Endpoint            | Calculation                                                                                     |
|---------------------|-------------------------------------------------------------------------------------------------|
| Acute Response      | $\Delta\text{OCR}$ : (Last injection before oligomycin, B) – (basal respiration, A)             |
|                     | $\Delta\Delta\text{OCR}$ : $\Delta\text{OCR}_{\text{CB-839}} - \Delta\text{OCR}_{\text{DMSO}}$  |
| Maximal Respiration | Max Respiration: (Max measurement after FCCP, C) – (Minimum measurement after Rot/Ant, D)       |
|                     | $\Delta\text{OCR}_{\text{max}}$ : $\text{OCR}_{\text{MaxCB-839}} - \text{OCR}_{\text{MaxDMSO}}$ |

**Supplemental Figure 8. Calculations and diagram for Substrate Oxidation Assay. Related to Figure 4.** Calculations for Substrate Oxidation Assay.

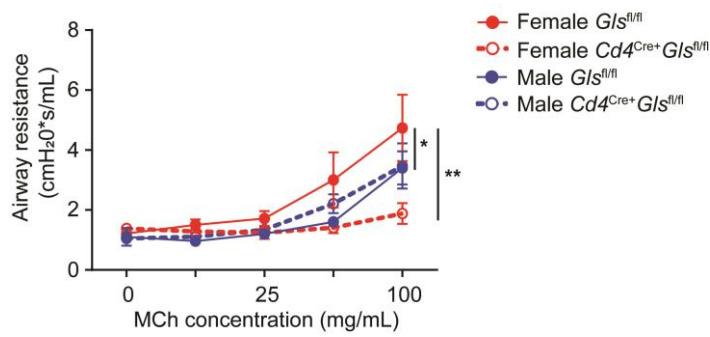

**Supplemental Figure 9. Glutaminolysis is required for HDM-induced AHR in female but not male mice. Related to Figure 4.** Airway hyperresponsiveness as measured by FlexiVent with increasing doses of methacholine was also conducted on HDM-challenged female and male *Glst<sup>fl/fl</sup>* and *Cd4<sup>Cre+</sup> Glst<sup>fl/fl</sup>* mice. n=4-6 mice per group and are representative of two independent experiments, \*p<0.05, \*\* p<0.01, ns not significant, ANOVA of repeated measures with Bonferroni post hoc analysis.

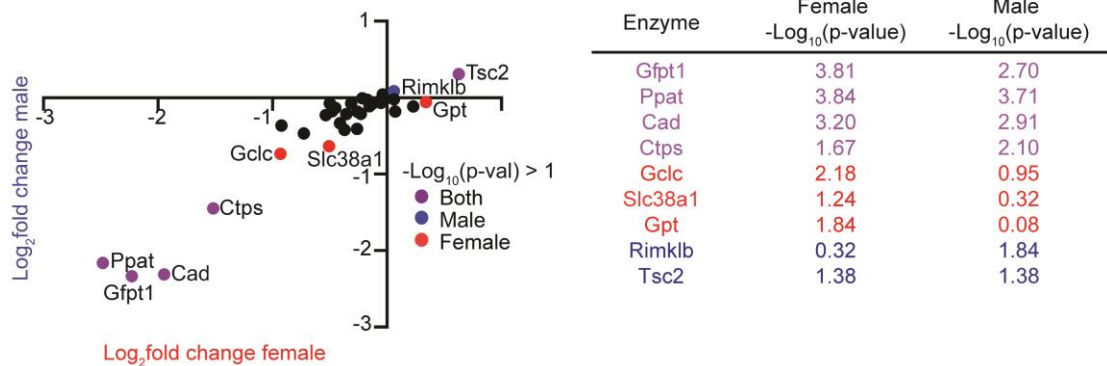

**Supplemental Figure 10. AR signaling reduces glutamine uptake in T cells. Related to Figure 5.** In vivo CRISPR screen using library targeting glutamine metabolism was conducted using Th17 cells from male and female OT-II Cas9 mice in vivo. Change in gRNA abundance in lung Th17 cells from females and males after OVA-induced lung inflammation with table showing statistics (n=4-5 mice, statistical analysis by MAGeCK, significantly affected represented by color of dot as shown in legend).

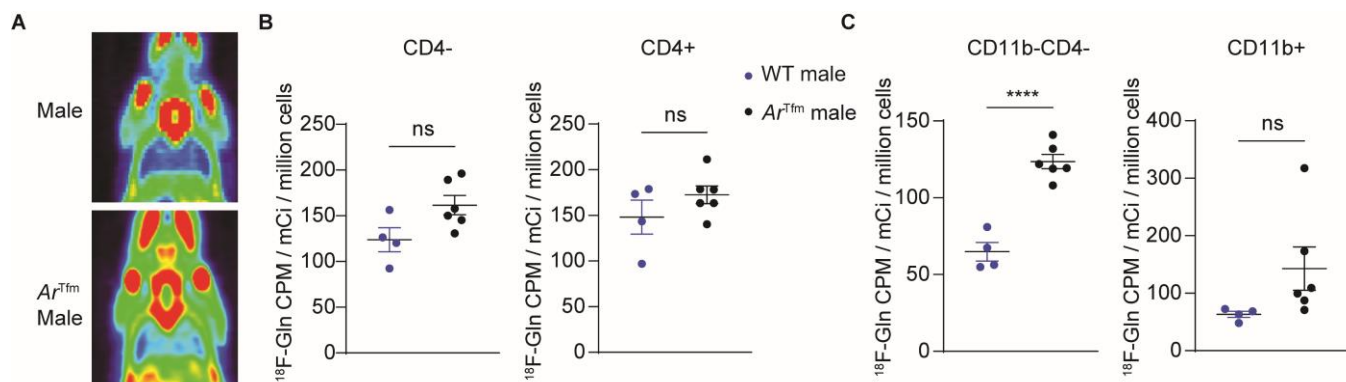

**Supplemental Figure 11. AR signaling reduces glutamine uptake in T cells. Related to Figure 5. (A)** Images of <sup>18</sup>F-glutamine by PET Imaging. **(B)** Quantification of <sup>18</sup>F-Glutamine concentration in spleen CD4- and CD4+ cells by magnetic separation and gamma counting, normalized to viable cells for WT male and *Ar<sup>Tfm</sup>* male mice (n=4-6 mice per group). **(C)** Quantification of <sup>18</sup>F-Glutamine concentration in lung CD11b-CD4- cells and CD11b+ cells by magnetic separation and gamma counting, normalized to viable cells (n=4-6 mice per group).

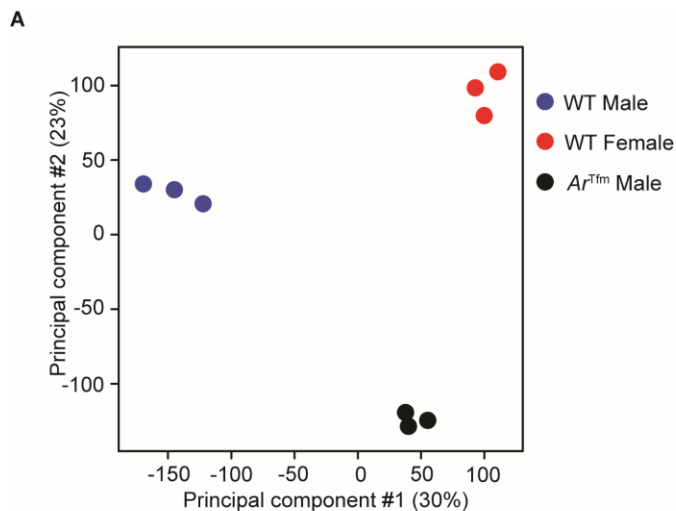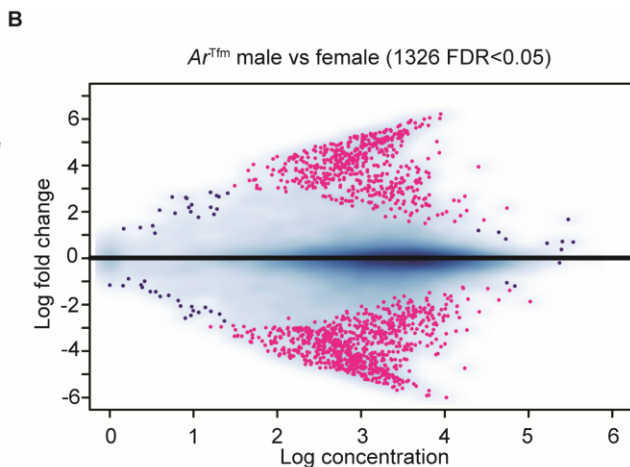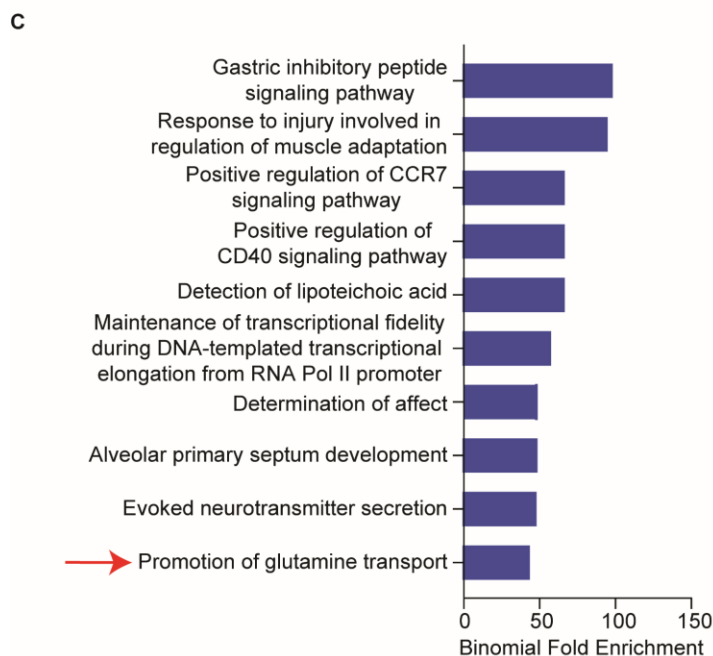

**Supplemental Figure 12. AR signaling alters H3K27 trimethylation in Th17 cells. Related to Figure 7. (A)** PCA for H3K27me3 analysis of Th17 cells from WT female, WT male, and  $Ar^{Tfm}$  male mice. **(B)** Analysis of differentially methylated areas in Th17 cells from female and  $Ar^{Tfm}$  male mice. **(C)** GREAT analysis to find differences in gene ontology pathways in Th17 cells from WT male versus WT female mice. Pathways shown had a region-based binomial FDR q-value <0.05.

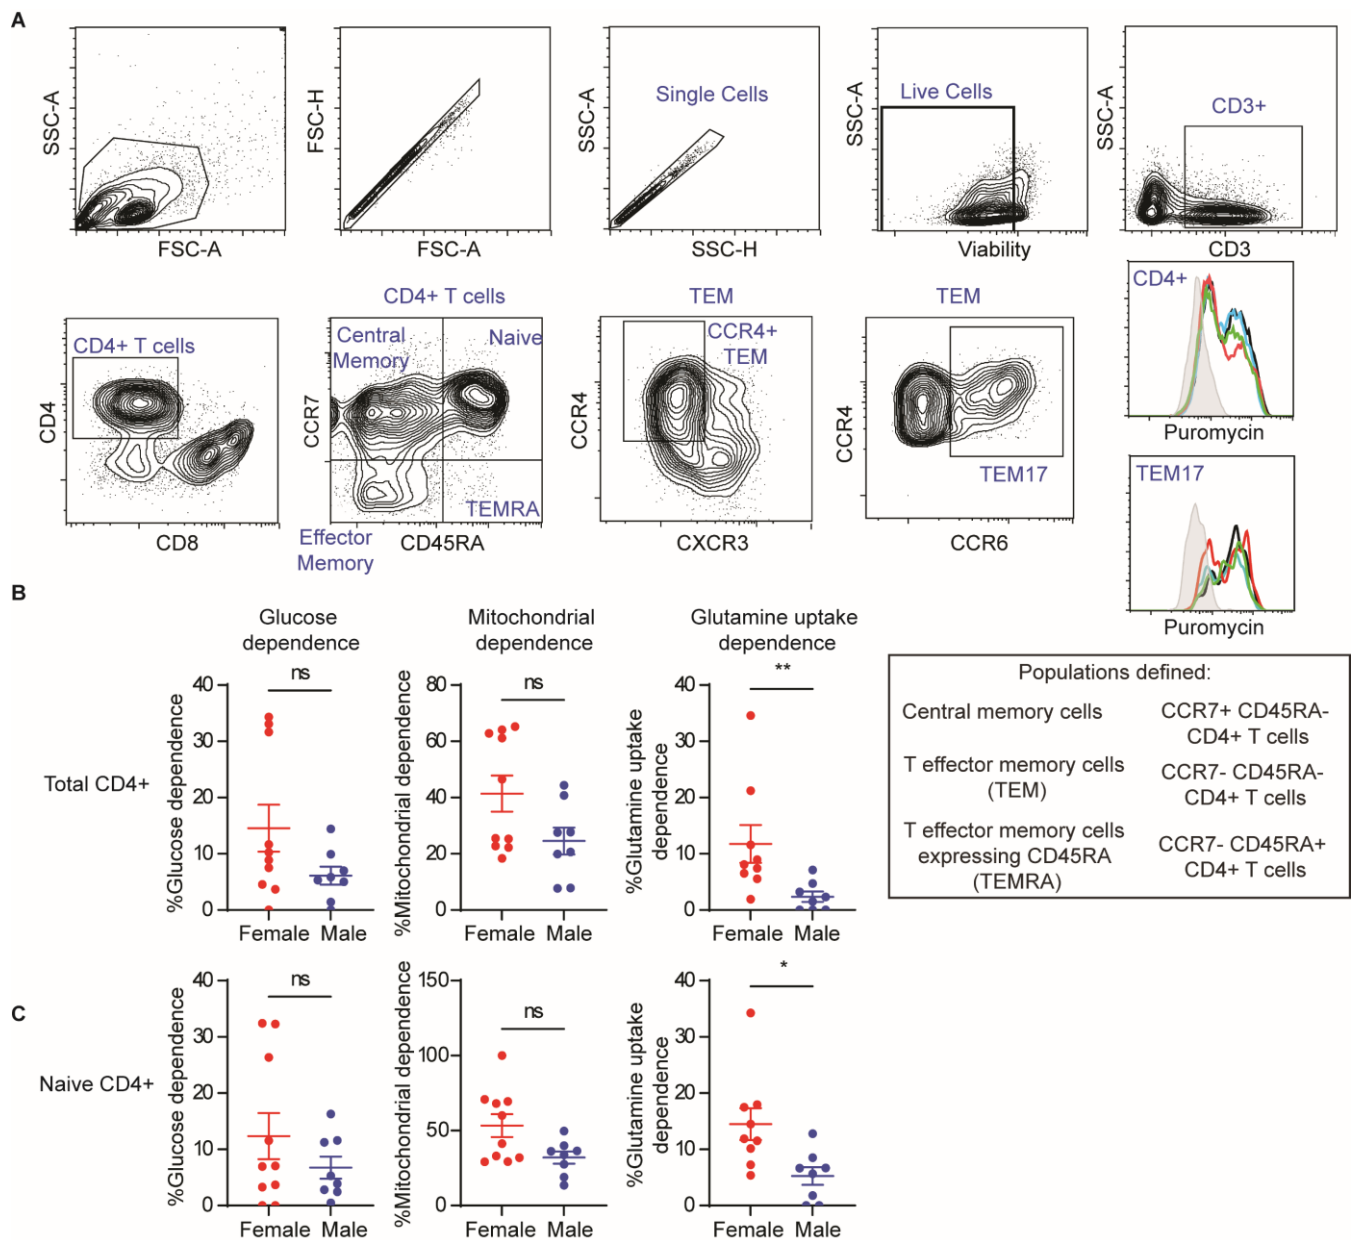

**Supplemental Figure 13. Males with severe asthma have decreased dependence upon glutamine uptake in circulating CD4+ T cell subsets compared to females with severe asthma. Related to Figure 8. (A)** Gating strategy for SCENITH experiments. **(B-C)** Glucose dependence, mitochondrial dependence, and glutamine uptake dependence in males and females measured using SCENITH inhibitors - 2-deoxyglucose (blue), oligomycin (red), and V9302 (green), all inhibitors (gray), and vehicle (black) in total CD4+ T (defined as Live, CD3+, CD4+, CD8-) and Naive CD4+ T cells (defined as Live, CD3+, CD4+ CD8-, CD45RA+, CCR7+). All graphs show mean  $\pm$  SEM. \* $p < 0.05$ , \*\* $p < 0.01$ , ns: not significant, or p-value as shown; two-tailed Mann-Whitney U test.

**Supplemental Table 1.** CYTOF panel. Related to Figure 1 and Figure S1-S2.

| <b>Marker</b>      | <b>Clone</b> | <b>Mass</b> | <b>Marker</b> | <b>Clone</b> | <b>Mass</b> |
|--------------------|--------------|-------------|---------------|--------------|-------------|
| CD45               | HI30         | 89          | CXCR3         | G025H7       | 156         |
| Dead Rhodium       | -            | 103         | CD137         | 4B4-1        | 158         |
| CD66b              | 80H3         | 108         | CCR7          | G043H7       | 159         |
| CD8a               | RPA-T8       | 109         | CTLA4         | 14D3         | 161         |
| CD16               | 3G8          | 110         | Glut1         | NB110-39113  | 163         |
| CD14               | M5E2         | 111         | CD95          | DX2          | 164         |
| CD4                | RPA-T4       | 112         | CD44          | BJ18         | 166         |
| CD19               | HIB19        | 113         | CD38          | HIT2         | 167         |
| CD3                | UCHT1        | 116         | CYTOC         | 6H2.B4       | 168         |
| CD45RO             | UCHL1        | 141         | CD25          | 2A3          | 169         |
| CPT1a              | 8F6AE9       | 142         | CD45RA        | HI100        | 170         |
| CD127              | A019D5       | 143         | CXCR5         | RF8B2        | 171         |
| ATP5a              | 7H10BD4F9    | 144         | CD57          | HCD57        | 172         |
| GRIM19             | 6E1BH7       | 145         | CXCR4         | 12G5         | 173         |
| CD20               | 2H7          | 147         | HLA-DR        | L243         | 174         |
| CD27               | L128         | 148         | PD-1          | EH12.2H7     | 175         |
| CCR4               | 205410       | 149         | CD56          | CMSSB        | 176         |
| CD134              | ACT35        | 150         | Cells Iridium | -            | 191         |
| ICOS               | C398.4A      | 151         | Cells Iridium | -            | 193         |
| TCR $\gamma\delta$ | 11F2         | 152         | CD11b         | ICRF44       | 209         |
| GLUD1              | polyclonal   | 154         |               |              |             |

**Supplemental Table 2.** Patient demographics for CYTOF on lymph nodes. Related to Figure 1 and Figure S1-S2.

|                           |                  | <b>Females<br/>(n=14)</b> | <b>Males<br/>(n=17)</b> |
|---------------------------|------------------|---------------------------|-------------------------|
| Age (mean + SD)           |                  | 37.7 ± 11.3               | 36.0 ± 11.5             |
| <b>Race</b>               | African American | 5 (35.7%)                 | 4 (23.5%)               |
|                           | Asian            | 0 (0%)                    | 1 (5.9%)                |
|                           | Native American  | 0 (0%)                    | 0 (0%)                  |
|                           | White            | 7 (50.0%)                 | 11 (64.7%)              |
|                           | Other            | 2 (14.3%)                 | 1 (5.9%)                |
| <b>Ethnicity</b>          | Non-Hispanic     | 12 (85.7%)                | 16 (94.1%)              |
|                           | Hispanic         | 2 (14.3%)                 | 1 (5.9%)                |
| <b>Cause<br/>of Death</b> | Accident         | 2 (14.3%)                 | 7 (41.1%)               |
|                           | Cardiac arrest   | 0 (0%)                    | 1 (5.9%)                |
|                           | Seizure          | 0 (0%)                    | 2 (11.8%)               |
|                           | Stroke           | 2 (14.3%)                 | 5 (29.4%)               |
|                           | Unknown          | 10 (71.4%)                | 2 (11.8%)               |



**Supplemental Table 3.** Metabolic pathway analysis on Th17 cells from *Ar<sup>Tfm</sup>* male mice compared to wild-type male mice. Related to Figure 4.

| Pathway                                  | FDR-adjusted<br>p-value | Impact |
|------------------------------------------|-------------------------|--------|
| Glycerophospholipid metabolism           | 0.0102                  | 0.03   |
| Glycine, serine and threonine metabolism | 0.0102                  | 0.05   |
| Arginine and proline metabolism          | 0.0102                  | 0.42   |
| Aminoacyl-tRNA biosynthesis              | 0.0102                  | 0.00   |
| Histidine metabolism                     | 0.0102                  | 0.22   |
| D-Glutamine and D-glutamate metabolism   | 0.0102                  | 0.50   |
| Glyoxylate and dicarboxylate metabolism  | 0.0102                  | 0.00   |
| Nitrogen metabolism                      | 0.0102                  | 0.00   |
| Porphyrin and chlorophyll metabolism     | 0.0102                  | 0.00   |
| Glutathione metabolism                   | 0.0102                  | 0.05   |
| Arginine biosynthesis                    | 0.0102                  | 0.25   |
| Nicotinate and nicotinamide metabolism   | 0.0141                  | 0.00   |

**Supplemental Table 4.** Patient demographics for SCENITH on PBMCs. Related to Figure 8 and S13.

|                  |                  | <b>Females<br/>(n=10)</b> | <b>Males<br/>(n=8)</b> |
|------------------|------------------|---------------------------|------------------------|
| Age (mean + SD)  |                  | 36.5 ± 5                  | 33.1 ± 9.9             |
| <b>Race</b>      | African American | 4 (40.0%)                 | 3 (37.5%)              |
|                  | Asian            | 2 (20.0%)                 | 0 (0.0%)               |
|                  | Native American  | 0 (0.0%)                  | 0 (0.0%)               |
|                  | White            | 2 (20.0%)                 | 4 (50.0%)              |
|                  | Other            | 2 (20.0%)                 | 1 (12.5%)              |
| <b>Ethnicity</b> | Non-Hispanic     | 12 (85.7%)                | 7 (87.5%)              |
|                  | Hispanic         | 2 (14.3%)                 | 1 (12.5%)              |

**Supplemental Table 5.** Antibodies used in this project.

| <b>Antibody</b>                         | <b>Manufacturer</b>      | <b>Catalog number</b> |
|-----------------------------------------|--------------------------|-----------------------|
| Anti-Human CD45                         | Fluidigm                 | Cat# 3089003          |
| Anti-Human CD66b                        | BioLegend                | Cat# 305102           |
| Anti-Human CD8a                         | BioLegend                | Cat# 301053           |
| Anti-Human CD16                         | BioLegend                | Cat# 302051           |
| Anti-Human CD14                         | BioLegend                | Cat# 301843           |
| Anti-Human CD4                          | BioLegend                | Cat# 300541           |
| Anti-Human CD19                         | BioLegend                | Cat# 302247           |
| Anti-Human CD3                          | BioLegend                | Cat# 300443           |
| Anti-Human CD45RO                       | BioLegend                | Cat# 304239           |
| Anti-Human CPT1a                        | Abcam                    | Cat# ab128568         |
| Anti-Human CD127                        | Fluidigm                 | Cat# 3143012B         |
| Anti-Human ATP5a                        | Abcam                    | Cat# ab110273         |
| Anti-Human GRIM19                       | Abcam                    | Cat# ab110240         |
| Anti-Human CD20                         | Fluidigm                 | Cat# 3147001B         |
| Anti-Human CD27                         | BD Custom                | Cat# 624084           |
| Anti-Human CCR4                         | Fluidigm                 | Cat# 3149029A         |
| Anti-Human CD134                        | Fluidigm                 | Cat# 3150023C         |
| Anti-Human ICOS                         | Fluidigm                 | Cat# 3151020B         |
| Anti-Human TCR $\gamma\delta$           | Fluidigm                 | Cat# 3152008B         |
| Anti-Human GLUD1                        | Abcam                    | Cat# ab34786          |
| Anti-Human CXCR3                        | Fluidigm                 | Cat# 3156004B         |
| Anti-Human CD137                        | Fluidigm                 | Cat# 3158013B         |
| Anti-Human CCR7                         | Fluidigm                 | Cat# 3159003          |
| Anti-Human CTLA-4                       | Fluidigm                 | Cat# 3161004B         |
| Anti-Human Glut1                        | Novus Biologicals        | Cat# NB110-39113      |
| Anti-Human CD95                         | Fluidigm                 | Cat# 3164008B         |
| Anti-Human CD44                         | Fluidigm                 | Cat# 3166001C         |
| Anti-Human CD38                         | Fluidigm                 | Cat# 3167001B         |
| Anti-Human CYTOC                        | BD Biosciences           | Cat# 556432           |
| Anti-Human CD25                         | Fluidigm                 | Cat# 3169003          |
| Anti-Human CD45RA                       | Fluidigm                 | Cat# 3170010          |
| Anti-Human CXCR5                        | Fluidigm                 | Cat# 3171014B         |
| Anti-Human CD57                         | Fluidigm                 | Cat# 3172009B         |
| Anti-Human CXCR4                        | Fluidigm                 | Cat# 3173001B         |
| Anti-Human HLA-DR                       | Fluidigm                 | Cat# 3174001          |
| Anti-Human PD-1                         | Fluidigm                 | Cat# 3175008          |
| Anti-Human CD56                         | Fluidigm                 | Cat# 3176003B         |
| Anti-Human CD11b                        | Fluidigm                 | Cat# 3209003          |
| Anti-Mouse CD45 BV786                   | BD Biosciences           | Cat# 564225           |
| Anti-Mouse CD45 Nova Fluor Blue 610-70S | Thermo Fisher Scientific | Cat# M005T02B06       |
| Anti-Mouse CD3 APC-Cy7                  | BioLegend                | Cat# 100222           |
| Anti-Mouse CD3 Pacific Blue             | BioLegend                | Cat# 100334           |
| Anti-Mouse CD4 Alexa Fluor 700          | BioLegend                | Cat# 100429           |
| Anti-Mouse CD4 PE-Cy5                   | BD Biosciences           | Cat# 553654           |
| Anti-Mouse IL-13 PE-Cy7                 | Thermo Fisher Scientific | Cat# 25-7133-82       |

|                                                    |                           |                    |
|----------------------------------------------------|---------------------------|--------------------|
| Anti-Mouse IL-17A BV605                            | BD Biosciences            | Cat# 564169        |
| Anti-Human/Mouse Gata3 PE-CF594                    | BD Biosciences            | Cat# 563510        |
| Anti-Mouse ROR $\gamma$ T BV786                    | BD Biosciences            | Cat# 564723        |
| Anti-Human Recombinant GLUD1+GLUD2 Alexa Fluor 488 | Abcam                     | Cat# ab204001      |
| Anti-Mouse phospho-S6 Alexa Fluor 700              | Cell Signaling Technology | Cat# 27036         |
| Anti-Human/Mouse Glut1 Alexa Fluor 647             | Abcam                     | Cat# ab195020      |
| Anti-Human/Mouse HIF-1 $\alpha$                    | R&D Systems               | Cat# IC1935P       |
| Anti-Mouse CD3e                                    | BD Biosciences            | Cat# 553057        |
| Anti-Mouse CD28                                    | BD Biosciences            | Cat# 553295        |
| Anti-Mouse IFN $\gamma$                            | BioLegend                 | Cat# 505847        |
| Anti-Mouse IL-4                                    | BioLegend                 | Cat# 504122        |
| Anti-Human/Mouse Tri-Methyl-Histone H3 (Lys27)     | Cell Signaling Technology | Cat# 9733S         |
| Anti-Human CD3 Alexa Fluor 700                     | BioLegend                 | Cat# 317339        |
| Anti-Human CD4 BV510                               | BioLegend                 | Cat# 317444        |
| Anti-Human CD8 $\alpha$ BV570                      | BioLegend                 | Cat# 301037        |
| Anti-Human CCR7 BV650                              | BioLegend                 | Cat# 353233        |
| Anti-Human CD45RA APC-Vio 770                      | Miltenyi Biotec           | Cat# 130-113-925   |
| Anti-Human CXCR3 PE-Cy5                            | BioLegend                 | Cat# 353755        |
| Anti-Human CCR4 PE-Vio 770                         | Miltenyi Biotec           | Cat# 130-118-496   |
| Anti-Human CCR6 APC                                | BioLegend                 | Cat# 353416        |
| Anti-Puromycin Alexa Fluor 488                     | Millipore Sigma           | Cat# MABE343-AF488 |

**Supplemental Table 6.** <sup>13</sup>C<sub>5</sub>-Glutamine SIL Species Analyte parameters. Related to Figure 6.

| <sup>13</sup> C <sub>5</sub> -Glutamine SIL Species Analyte    | Q1 (m/z) | Q3 (m/z) | RT (min) |
|----------------------------------------------------------------|----------|----------|----------|
| <sup>13</sup> C <sub>3</sub> -Pyruvate                         | 90       | 45       | 3.1      |
| <sup>13</sup> C <sub>1</sub> -Lactate (C1) [INTERNAL STANDARD] | 90       | 43       | 5.5      |
| <sup>13</sup> C <sub>2</sub> -Acetyl-CoA                       | 810      | 426      | 13.0     |
| <sup>13</sup> C <sub>2</sub> -Citrate/Isocitrate               | 193      | 113      | 13.4     |
| <sup>13</sup> C <sub>4</sub> -Citrate/Isocitrate               | 195      | 114      | 13.4     |
| <sup>13</sup> C <sub>5</sub> -Citrate/Isocitrate               | 196      | 116      | 13.4     |
| <sup>13</sup> C <sub>6</sub> -Citrate/Isocitrate               | 197      | 116      | 13.4     |
| <sup>13</sup> C <sub>2</sub> - <i>cis</i> -Aconitate           | 175      | 86       | 12.5     |
| <sup>13</sup> C <sub>4</sub> - <i>cis</i> -Aconitate           | 177      | 88       | 12.5     |
| <sup>13</sup> C <sub>5</sub> - <i>cis</i> -Aconitate           | 178      | 89       | 12.5     |
| <sup>13</sup> C <sub>6</sub> - <i>cis</i> -Aconitate           | 179      | 89       | 12.5     |
| <sup>13</sup> C <sub>3</sub> - $\alpha$ -Ketoglutarate         | 148      | 104      | 10.3     |
| <sup>13</sup> C <sub>5</sub> - $\alpha$ -Ketoglutarate         | 150      | 105      | 10.3     |
| <sup>13</sup> C <sub>2</sub> -Succinyl-CoA                     | 868      | 426      | 13.5     |
| <sup>13</sup> C <sub>3</sub> -Succinyl-CoA                     | 869      | 426      | 13.5     |
| <sup>13</sup> C <sub>4</sub> -Succinyl-CoA                     | 870      | 426      | 13.5     |
| <sup>13</sup> C <sub>2</sub> -Fumarate                         | 117      | 73       | 11.0     |
| <sup>13</sup> C <sub>3</sub> -Fumarate                         | 118      | 73       | 11.0     |
| <sup>13</sup> C <sub>4</sub> -Fumarate                         | 119      | 74       | 11.0     |
| <sup>13</sup> C <sub>2</sub> -Malate                           | 135      | 117      | 11.4     |
| <sup>13</sup> C <sub>3</sub> -Malate                           | 136      | 118      | 11.4     |
| <sup>13</sup> C <sub>4</sub> -Malate                           | 137      | 119      | 11.4     |
| <sup>13</sup> C <sub>2</sub> -Oxaloacetate                     | 133      | 89       | 4.8      |
| <sup>13</sup> C <sub>3</sub> -Oxaloacetate                     | 134      | 90       | 4.8      |
| <sup>13</sup> C <sub>4</sub> -Oxaloacetate                     | 135      | 90       | 4.8      |
| <sup>13</sup> C <sub>3</sub> -Glutamine                        | 148      | 130      | 9.5      |
| <sup>13</sup> C <sub>5</sub> -Glutamine                        | 150      | 132      | 9.5      |
| <sup>13</sup> C <sub>3</sub> -Glutamate                        | 149      | 131      | 11       |
| <sup>13</sup> C <sub>5</sub> -Glutamate                        | 151      | 133      | 11       |
| <sup>13</sup> C <sub>2</sub> -Aspartate                        | 134      | 89       | 11.2     |
| <sup>13</sup> C <sub>3</sub> -Aspartate                        | 135      | 90       | 11.2     |
| <sup>13</sup> C <sub>4</sub> -Aspartate                        | 136      | 91       | 11.2     |
| <sup>13</sup> C <sub>3</sub> -GSH                              | 309      | 128      | 11.1     |
| <sup>13</sup> C <sub>5</sub> -GSH                              | 311      | 128      | 11.1     |
| <sup>13</sup> C <sub>6</sub> -GSSG                             | 617      | 309      | 13.7     |
| <sup>13</sup> C <sub>10</sub> -GSSG                            | 621      | 311      | 13.7     |

**Q1 and Q3:** mass charge ratio (m/z) for precursor and product ions; **RT** – retention time
